# Supplementary material for: Comparative Efficacy of a High-Dose vs Standard-Dose Hepatitis B Revaccination Schedule Among Patients With HIV: A Randomized Clinical Trial
Source: PubMed Central journal article supplement (PMC8383137; doi:10.1001/jamanetworkopen.2021.20929), 2021-08-23
Supplement: jamanetwopen-e2120929-s002.pdf [file jamanetwopen-e2120929-s002.pdf]

## Supplemental Online Content

Vargas JI, Jensen D, Martínez F, et al. Comparative efficacy of a high-dose vs standard dose hepatitis B revaccination schedule among patients with HIV. *JAMA Netw Open.* 2021;4(8):e2120929. doi:10.1001/jamanetworkopen.2021.20929

**eTable 1.** Detailed Patient Baseline Characteristics

**eTable 2.** Summary of previously published studies for HBV re-vaccination in patients living with HIV

This supplemental material has been provided by the authors to give readers additional information about their work.

**eTable 1. Detailed Patient Baseline Characteristics.**

| Table 2: Detailed Patient Baseline Characteristics |                       |                          |               |                   |
|----------------------------------------------------|-----------------------|--------------------------|---------------|-------------------|
| Characteristic                                     | Standard Group (n=55) | Intensified Group (n=52) | Total (n=107) | P-Value           |
| Clinical Characteristics                           |                       |                          |               |                   |
| Mean age (years) (SD)                              | 48.2±12.9             | 45.6±13.7                | 47.0±13.3     | 0.31 <sup>1</sup> |
| Male sex (n, %)                                    | 41 (75.9%)            | 40 (78.4%)               | 81 (75.7%)    | 0.82 <sup>2</sup> |
| Mean weight (Kg) (SD)                              | 75.2±21.8             | 76.1±14.8                | 75.7±18.5     | 0.81 <sup>1</sup> |
| Mean body mass index (Kg/m <sup>2</sup> ) (SD)     | 27.0±5.1              | 27.5±4.2                 | 27.3±4.7      | 0.68 <sup>1</sup> |
| Mean abdominal perimeter (cm) (SD)                 | 94.3±10.9             | 95.4±13.9                | 94.8±12.2     | 0.78 <sup>1</sup> |
| Alcohol consumption (n, %)                         | 31 (57.4%)            | 27 (52.9%)               | 58 (55.2%)    | 0.70 <sup>2</sup> |
| Substance abuse (n, %)                             | 5 (9.3%)              | 6 (11.5%)                | 11 (10.4%)    | 0.76 <sup>2</sup> |
| Active smoker (n, %)                               | 22 (40.7%)            | 22 (43.1%)               | 44 (41.9%)    | 0.85 <sup>2</sup> |
| Diabetes mellitus (n, %)                           | 3 (5.6%)              | 2 (4.0%)                 | 5 (4.8%)      | 1.00 <sup>2</sup> |
| Arterial hypertension (n, %)                       | 16 (29.1%)            | 12 (23.5%)               | 28 (26.4%)    | 0.67 <sup>2</sup> |
| Dyslipidemia (n, %)                                | 37 (69.8%)            | 23 (46.9%)               | 60 (58.8%)    | 0.03 <sup>2</sup> |
| Syphilis (n, %)                                    | 4 (7.3%)              | 8 (16.0%)                | 12 (11.4%)    | 0.22 <sup>2</sup> |
| Hepatitis C virus infection (n, %)                 | 0 (0%)                | 1 (2.0%)                 | 1 (1%)        | 0.47 <sup>2</sup> |
| Laboratory                                         |                       |                          |               |                   |
| Mean serum creatinine (mg/dl) (SD)                 | 0.81±0.13             | 0.80±0.14                | 0.81±0.14     | 0.86 <sup>2</sup> |
| Mean blood glucose (mg/dl) (SD)                    | 96.8±27.4             | 95.5±34.4                | 96.2±30.9     | 0.82 <sup>2</sup> |
| Mean thyrotropin (uIU/mL) (SD)                     | 3.5±1.9               | 3.1±2.0                  | 3.3±1.9       | 0.34 <sup>1</sup> |
| Mean cholesterol (mg/dl) (SD)                      | 206.7±45.0            | 197±37.8                 | 201±41.6      | 0.23 <sup>1</sup> |
| Mean LDL cholesterol (mg/dl) (SD)                  | 113±44.2              | 127±50.1                 | 120.6±47.6    | 0.15 <sup>1</sup> |
| Mean HDL cholesterol (mg/dl) (SD)                  | 47.2±15.5             | 45.9±14.1                | 46.6±14.7     | 0.67 <sup>1</sup> |
| Mean triglycerides (mg/dl) (SD)                    | 227.5±138             | 202.3±167                | 215±152       | 0.40 <sup>1</sup> |
| Mean bilirubin (mg/dl) (SD)                        | 0.8±0.7               | 1.0±1.1                  | 0.90±0.91     | 0.28 <sup>1</sup> |
| Mean glutamic pyruvic transaminase (U/L) (SD)      | 34.4±19.9             | 37.6±20.5                | 36.0±20.1     | 0.41 <sup>1</sup> |
| Mean glutamic oxoalacetic transaminase (U/L) (SD)  | 29.4±11.5             | 30.6±9.8                 | 30.0±10.6     | 0.57 <sup>1</sup> |
| Mean gammaglutamyl transpeptidase (U/L) (SD)       | 52.3±52.5             | 50.2±43.1                | 51.4±48.1     | 0.84 <sup>1</sup> |
| Mean alkaline phosphatase (U/L) (SD)               | 110±33.1              | 108.2±34.4               | 109.1±33.6    | 0.78 <sup>1</sup> |
| Mean prothrombin time (%) (SD)                     | 98.7±13.4             | 98.2±15.7                | 98.5±14.5     | 0.88 <sup>1</sup> |

|                                                    |             |             |             |                   |
|----------------------------------------------------|-------------|-------------|-------------|-------------------|
| Mean serum albumin (g/dL) (SD)                     | 4.4±0.48    | 4.4±0.39    | 4.4±0.42    | 0.93 <sup>1</sup> |
| Mean hematocrit (%) (SD)                           | 43.3±4.5    | 43.5±3.4    | 43.4±4.0    | 0.74 <sup>1</sup> |
| Mean leucocytes (x1000cells/mm <sup>3</sup> ) (SD) | 6.5±2.5     | 6.6±2.0     | 6.6±2.3     | 0.67 <sup>1</sup> |
| Mean platelets (x1000cells/mm <sup>3</sup> ) (SD)  | 250±63      | 238±55      | 244±60      | 0.29 <sup>1</sup> |
| Mean CD4 count (cells/mm <sup>3</sup> ) (SD)       | 424±210     | 412±201     | 418±205     | 0.78 <sup>1</sup> |
| Nadir CD4 count (cells/mm <sup>3</sup> ) (SD)      | 150.5±17    | 123.5±17    | 136.4±115   | 0.23 <sup>3</sup> |
| Mean CD8 count (cells/mm <sup>3</sup> ) (SD)       | 887±450     | 1000±497    | 941±474     | 0.22 <sup>1</sup> |
| Mean CD4/CD8 ratio (SD)                            | 0.58±0.33   | 0.49±0.32   | 0.54±0.33   | 0.17 <sup>1</sup> |
| HIV Infection Characteristics                      |             |             |             |                   |
| Hepatitis C Virus infection (n, %)                 | 0 (0%)      | 1 (2.0%)    | 1 (1%)      | 0.47 <sup>2</sup> |
| HIV Stage (n, %)                                   |             |             |             | 0.92 <sup>2</sup> |
| A1                                                 | 2 (3.9%)    | 2 (3.9%)    | 4 (3.9%)    |                   |
| A2                                                 | 7 (13.73%)  | 13 (25.5%)  | 20 (19.6%)  |                   |
| A3                                                 | 4 (7.8%)    | 4 (7.8%)    | 8 (7.8%)    |                   |
| B1                                                 | 1 (2%)      | 0 (0%)      | 1 (1%)      |                   |
| B2                                                 | 5 (9.8%)    | 6 (11.8%)   | 11 (10.8%)  |                   |
| B3                                                 | 13 (25.9%)  | 10 (19.6%)  | 23 (22.6%)  |                   |
| C1                                                 | 1 (2%)      | 1 (2%)      | 2 (2%)      |                   |
| C2                                                 | 1 (2%)      | 1 (2%)      | 2 (2%)      |                   |
| C3                                                 | 17 (33.3%)  | 14 (27.5%)  | 31 (30.4%)  |                   |
| Antiretroviral Therapy (n, %)                      | 54 (98.2%)  | 51 (98.0%)  | 105 (98.1%) | 1.00 <sup>2</sup> |
| Use of Efavirenz (n, %)                            | 25 (47.2%)  | 26 (51.0%)  | 51 (49.0%)  | 0.85 <sup>2</sup> |
| Undetectable viral load (n, %)                     | 49 (89.1%)  | 43 (83.0%)  | 92 (86.0%)  | 0.41 <sup>2</sup> |
| Median time living with HIV (months) (IQR)         | 92 (46-158) | 77 (46-122) | 85 (46-142) | 0.50 <sup>3</sup> |
| Median time using ART (months) (IQR)               | 58 (32-112) | 55 (32-94)  | 56 (32-109) | 0.89 <sup>3</sup> |

**eTable 2.** Summary of previously published studies for HBV re-vaccination in patients living with HIV.

| Study                   | Year | Country     | Design        | N   | Vaccination schedule (months) | Response (%)                          | Ref. |
|-------------------------|------|-------------|---------------|-----|-------------------------------|---------------------------------------|------|
| Rey et al.              | 2000 | France      | Prospective   | 9   | Double 0-1-2                  | 78                                    | (13) |
| de Vries- Sluijs et al. | 2008 | Netherlands | Prospective   | 144 | Double 0-1-2                  | 50.7                                  | (14) |
| Cruciani et al.         | 2009 | Italy       | Prospective   | 26  | Double 0-1-2                  | 73                                    | (17) |
| Bloom et al.            | 2009 | USA         | Retrospective | 63  | Variable                      | 29-36                                 | (25) |
| Pettit et al.           | 2010 | USA         | Retrospective | 30  | Double 0-1-6                  | 66.7                                  | (16) |
| Pseudos et al.          | 2010 | USA         | Retrospective | 101 | Simple vs Double vs Variable  | Simple: 59<br>Double: 85              | (15) |
| Rowley et al.           | 2014 | UK          | Prospective   | 38  | Variable                      | 27-75                                 | (22) |
| Rey et al.              | 2015 | France      | RCT           | 178 | Simple vs Double 0-1-6        | Simple: 67%<br>Double: 74%<br>NS (*). | (18) |
