# Supplementary material for: Comparative Efficacy of a High-Dose vs Standard-Dose Hepatitis B Revaccination Schedule Among Patients With HIV: A Randomized Clinical Trial
Source: PubMed Central journal article supplement (PMC8383137; doi:10.1001/jamanetworkopen.2021.20929), 2021-08-23
Supplement: jamanetwopen-e2120929-s003.pdf [file jamanetwopen-e2120929-s003.pdf]

## Data Sharing Statement

### Data

**Data available:** Yes

**Data types:** Deidentified participant data

**How to access data:** [jivargasd@uc.cl](mailto:jivargasd@uc.cl)

**When available:** With publication

### Supporting Documents

**Document types:** None

### Additional Information

**Who can access the data:** researchers whose proposed use of the data has been approved

**Types of analyses:** Specified purpose

**Mechanisms of data availability:** after approval of a proposal

**Any additional restrictions:** no.
